# Supplementary material for: Targeted expression of Vitreoscilla hemoglobin improves the production of tropane alkaloids in Hyoscyamus niger hairy roots
Source: PubMed Central journal article supplement (PMC6299274; doi:10.1038/s41598-018-36156-y), 2018-12-19
Supplement: 41598_2018_36156_MOESM1_ESM.pdf [file 41598_2018_36156_MOESM1_ESM.pdf]

**Targeted expression of *Vitreoscilla* hemoglobin improves the production of tropane alkaloids in *Hyoscyamus niger* hairy roots**

Zhiying Guo<sup>1,2,3\*</sup>, Hexin Tan<sup>3\*</sup>, Zongyou Lv<sup>3</sup>, Qian Ji<sup>3</sup>, Yuxiang Huang<sup>1</sup>, Jingjing Liu<sup>2</sup>, Donghong Chen<sup>2</sup>, Yong Diao<sup>1</sup>, Jinping Si<sup>2</sup> and Lei Zhang<sup>2,3</sup>

*1 School of Biomedical sciences, Huaqiao University, Quanzhou, Fujian 362000, China*

*2 State Key Laboratory of Subtropical Silviculture, Zhejiang A & F University, Hangzhou, Zhejiang 311300, China.*

*3 Department of Pharmaceutical Botany, School of Pharmacy, Naval Medical University (Second Military Medical University), Shanghai 200433, China*

\*These authors contributed equally to this work. Correspondence and requests for materials should be addressed to L.Z. (email: zhanglei@smmu.edu.cn or leizhang100@163.com)

**Supplementary Table S1.** PCR primers used in the text.

| <b>Primers used for PCR analysis</b> |                              |                                 |                   |
|--------------------------------------|------------------------------|---------------------------------|-------------------|
| <i>Primer names</i>                  | <i>Purpose</i>               | <i>Primer Sequences (5'-3')</i> | <i>Base Pairs</i> |
| ubVHb-F- <i>Bgl</i> III              | For subcellular localization | AAAGATCTATGTTAGACCAGCAAACCAT    | 28                |
| ubVHb-R- <i>Spe</i> I                | For subcellular localization | AAACTAGTTTCAACCGCTTGAGCGTACA    | 28                |
| ubCoxIV-F- <i>Nco</i> I              | For subcellular localization | AGCACCATGGTTTTCACTACGTCAATCTA   | 28                |
| ubCoxIV-R- <i>Bgl</i> III            | For subcellular localization | AAAGATCTTTTTTGTCTGAAGCAG        | 23                |
| ubRecA-F- <i>Nco</i> I               | For subcellular localization | AGAACCATGGATTCACAGCTAGTCTT      | 26                |
| ubRecA-R- <i>Bgl</i> III             | For subcellular localization | AAAGATCTTCTGTTCATCGAATTCAG      | 25                |
| ubAtHRS1-F- <i>Nco</i> I             | For subcellular localization | CACTCCATGGTCGACCCACGCGTCC       | 25                |
| ubAtHRS1-R- <i>Bgl</i> III           | For subcellular localization | AAAGATCTGATTGACATCGATCTTCTT     | 27                |
| 1b-F                                 | For molecular analysis       | TCGCCATGCCTCACCAACTCAC          | 22                |
| 1b-R                                 | For molecular analysis       | CCTTGATCGAGCCGGGTGAGAA          | 22                |
| 1c-F                                 | For molecular analysis       | CGAGGGGATCCGATTTGCTT            | 20                |
| 1c-R                                 | For molecular analysis       | GACGCCCTCCTCGCCTTCCT            | 20                |
| 2t-F                                 | For molecular analysis       | CGATTTGTGTACGCCCGACAGTC         | 23                |
| 2t-R                                 | For molecular analysis       | CGATGTAGGAGGGCGTGGATATG         | 23                |
| 5S-F                                 | For molecular analysis       | GAGGACCTAACAGAACTCGCC           | 21                |
| VHb-F                                | For qRT-PCR                  | GCCAAACACCCTGAAGTACG            | 20                |
| VHb-R                                | For qRT-PCR                  | ACGCCTGCTTGACAATGTTT            | 20                |
| 18S-F                                | For qRT-PCR                  | AAACGGCTACCACATCCAAG            | 20                |
| 18S-R                                | For qRT-PCR                  | CCTCCAATGGATCCTCGTTA            | 20                |
| CYP80F1-F                            | For qRT-PCR                  | TGTGTGGAAAATGGCAAGGG            | 20                |
| CYP80F1-R                            | For qRT-PCR                  | GCCAAAGATTGTCCAGCACA            | 20                |
| PMT-F                                | For qRT-PCR                  | CTACCTAGCAGCAGGATTCG            | 20                |
| PMT-R                                | For qRT-PCR                  | GGTCAGAAGAGTCCACAATAATG         | 23                |
| H6H-F                                | For qRT-PCR                  | GCCAGACCCAAGTTCAAC              | 19                |
| H6H-R                                | For qRT-PCR                  | CAGCAATCCAGGTAGCATCC            | 20                |

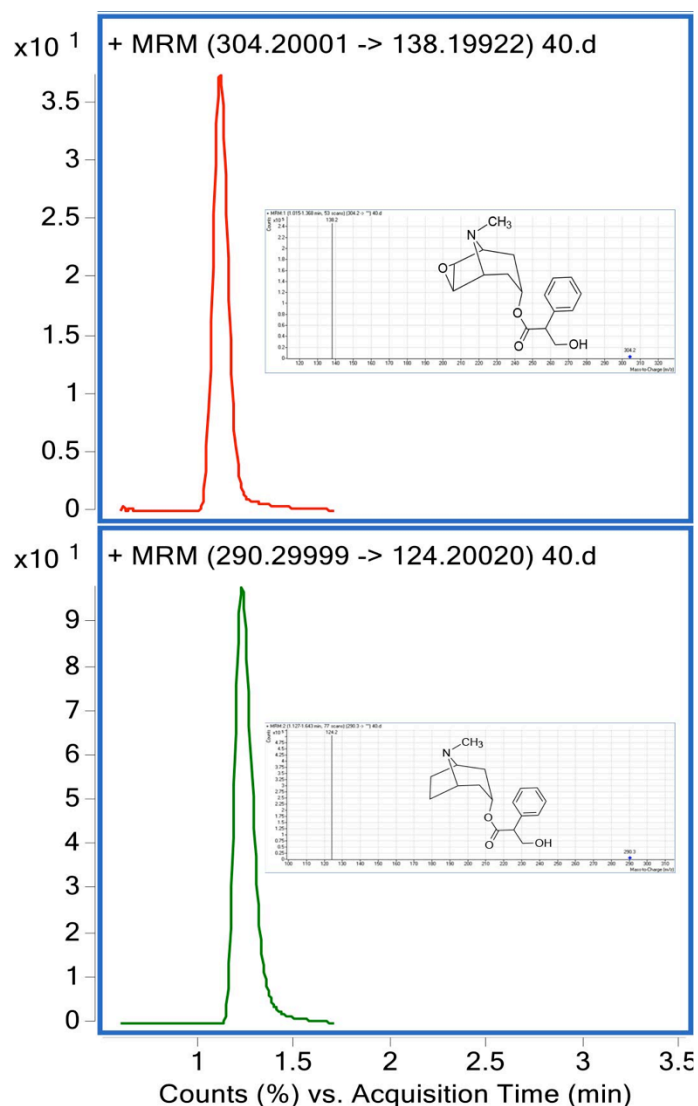

**Supplementary Figure S1.** Chromatogram result of VHb-expression transgenic hairy roots by electrospray LC-MS/MS. The hyoscyamine and scopolamine compounds were detected using ESI in negative-ion mode, quantified by multiple-reaction monitoring (MRM) mode using following transition mass of  $m/z$ , 290.3 $\rightarrow$ 124.2 for hyoscyamine, 304.2 $\rightarrow$ 138.2 for scopolamine. The extracted peak identification: (A) hyoscyamine (290) and (B) scopolamine (304). This chromatogram is the result of V1 transgenic line. All standards were purchased from Sigma-Aldrich (St. Louis, MO). Data analysis was carried out using the Agilent Mass Hunter Workstation software.
